# Supplementary material
Source: Royal Society of Chemistry journal article supplement (doi:10.1039/d6cc00225k)
Supplement: d6cc00225k1.pdf [file d6cc00225k1.pdf]

## Supporting Information

Preparation of Heterogeneous VO<sub>x</sub>/V<sub>2</sub>C MXene@V<sub>2</sub>O<sub>5</sub> via Van der Waals Self-Assembly for High-Performance Aqueous Zinc-Ion Batteries

*Huan Liu, Yi Wu, Lin Jiang, Bin Cao\*, Zijing Wang, Mengmeng Zou, Yu Li, and Jie Ding*

College of Materials Science and Engineering, Xi'an University of Science and Technology, Xi'an 710054, China.

\*Corresponding authors.

E-mail addresses: [caobin@xust.edu.cn](mailto:caobin@xust.edu.cn)

## Experimental Section

### 1. Synthesis of Materials

*V<sub>2</sub>O<sub>5</sub> Nanosheets:* V<sub>2</sub>O<sub>5</sub> nanosheets were synthesized via a hydrothermal method. Briefly, 0.364 g of commercial V<sub>2</sub>O<sub>5</sub> powder was dissolved in 30 mL of deionized water under stirring for 15 min. Subsequently, 15 mL of H<sub>2</sub>O<sub>2</sub> was added, and the mixture was stirred for 30 min until a transparent light-yellow solution formed. The solution was transferred into a Teflon-lined autoclave and heated at 200 °C for 20 h. After cooling to room temperature, the resulting gel was collected and freeze-dried for 24 h to obtain V<sub>2</sub>O<sub>5</sub> nanosheets. A dispersion with a concentration of 1 mg mL<sup>-1</sup> was prepared in N-methyl-2-pyrrolidone (NMP) for further use.

*VO<sub>x</sub>/V<sub>2</sub>C Nanosheets:* V<sub>2</sub>CT<sub>x</sub> MXene was first prepared by selectively etching the Al layer from V<sub>2</sub>AlC MAX phase. In a typical procedure, 1.0 g of V<sub>2</sub>AlC powder was slowly added to 20 mL of hydrofluoric acid (HF, 40 wt%) in an ice bath under stirring for 5 min. The mixture was then continuously stirred at 30 °C for 45 h. The resulting suspension was centrifuged and washed repeatedly with deionized water until the supernatant reached pH ≈ 6. Tetraethylammonium hydroxide (C<sub>4</sub>H<sub>13</sub>NO) was introduced as an intercalant, and the mixture was stirred at room temperature for 12 h, followed by ultrasonication for 1 h under N<sub>2</sub> atmosphere. After centrifugation at 3500 rpm, the sediment was washed

several times and re-dispersed in water. The obtained ink was further centrifuged at 9000 rpm for 30 min, and the collected solid was vacuum-dried for 8 h. Finally, the dried powder was annealed at 600 °C under a CO<sub>2</sub> atmosphere for 30 min to obtain VO<sub>x</sub>/V<sub>2</sub>C. A 1 mg mL<sup>-1</sup> dispersion in NMP was prepared for subsequent use.

*VO<sub>x</sub>/V<sub>2</sub>C@V<sub>2</sub>O<sub>5</sub> Hybrid:* The VO<sub>x</sub>/V<sub>2</sub>C@V<sub>2</sub>O<sub>5</sub> heterostructure was assembled via van der Waals interactions. Typically, the VO<sub>x</sub>/V<sub>2</sub>C-NMP dispersion was added dropwise into the V<sub>2</sub>O<sub>5</sub>-NMP dispersion at a mass ratio of 4:6 (VO<sub>x</sub>/V<sub>2</sub>C: V<sub>2</sub>O<sub>5</sub>). The mixture was sonicated for 1 h at room temperature to promote self-assembly. The final product was collected by vacuum filtration and dried overnight at 60 °C under vacuum.

## **2. Material characterization**

The morphology and microstructure of the samples were examined by field-emission scanning electron microscopy (FE-SEM, Hitachi S-4800), scanning transmission electron microscopy (STEM, JEOL JEM-2800), and atomic force microscopy (AFM, Bruker Edge). Crystalline phases were identified by X-ray diffraction (XRD, Bruker D8 Discovery) using Cu K $\alpha$  radiation ( $\lambda = 0.15406$  nm) in the  $2\theta$  range of 3-90° with a scan rate of 10° min<sup>-1</sup>. Chemical states and surface composition were analyzed by X-ray photoelectron spectroscopy (XPS, Thermo Scientific K-Alpha). Raman spectra were recorded on a Horiba LabRAM HR Evolution spectrometer

with a 633 nm He-Ne laser. The wettability of the electrodes was evaluated using a contact-angle goniometer (POWREACH JC2000DM) by depositing a droplet of electrolyte onto the electrode surface.

### **3. Electrochemical measurements**

Electrochemical tests were performed using an electrochemical workstation (DH7000, Jiangsu Donghua) and a multi-channel battery tester (CT-4008T-5V50mA-164, Neware). The cathode slurry was prepared by mixing the active material, Super P conductive carbon, and polyvinylidene fluoride (PVDF) binder in a weight ratio of 80:10:10 in N-methyl-2-pyrrolidone. The slurry was coated onto a stainless-steel mesh current collector and dried overnight at 60 °C under vacuum. The mass loading of active material was approximately 1.5 mg cm<sup>-2</sup>. A glass fiber membrane (Whatman GF/D) was used as the separator, and 3 M Zn(CF<sub>3</sub>SO<sub>3</sub>)<sub>2</sub> aqueous solution was employed as the electrolyte. All measurements were carried out at room temperature.

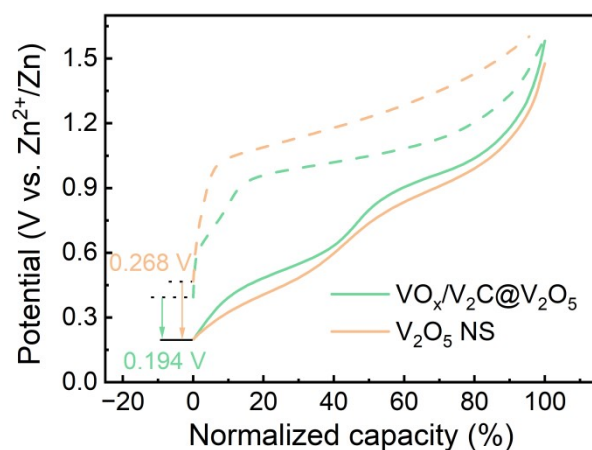

**Figure S1** Overpotential of  $V_2O_5$  NS and  $VO_x/V_2C@V_2O_5$  at a current density of  $3 \text{ A g}^{-1}$ .

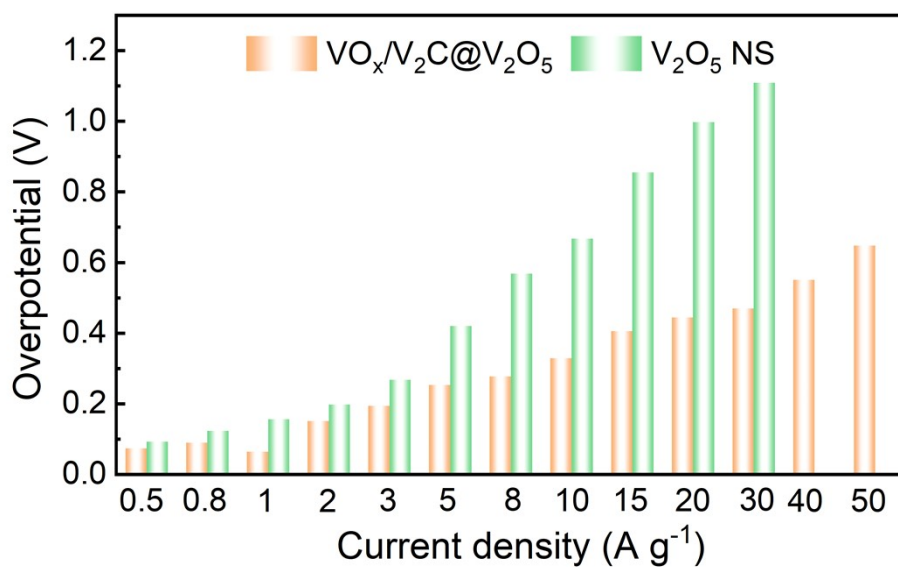

**Figure S2** Summary of overpotentials of  $V_2O_5$  NS and  $VO_x/V_2C@V_2O_5$  at different current densities.
